# Supplementary material
Source: PubMed Central journal article supplement (PMC5728175)
Supplement: NIHMS914863-supplement-6.pdf [file NIHMS914863-supplement-6.pdf]

**Figure S1**

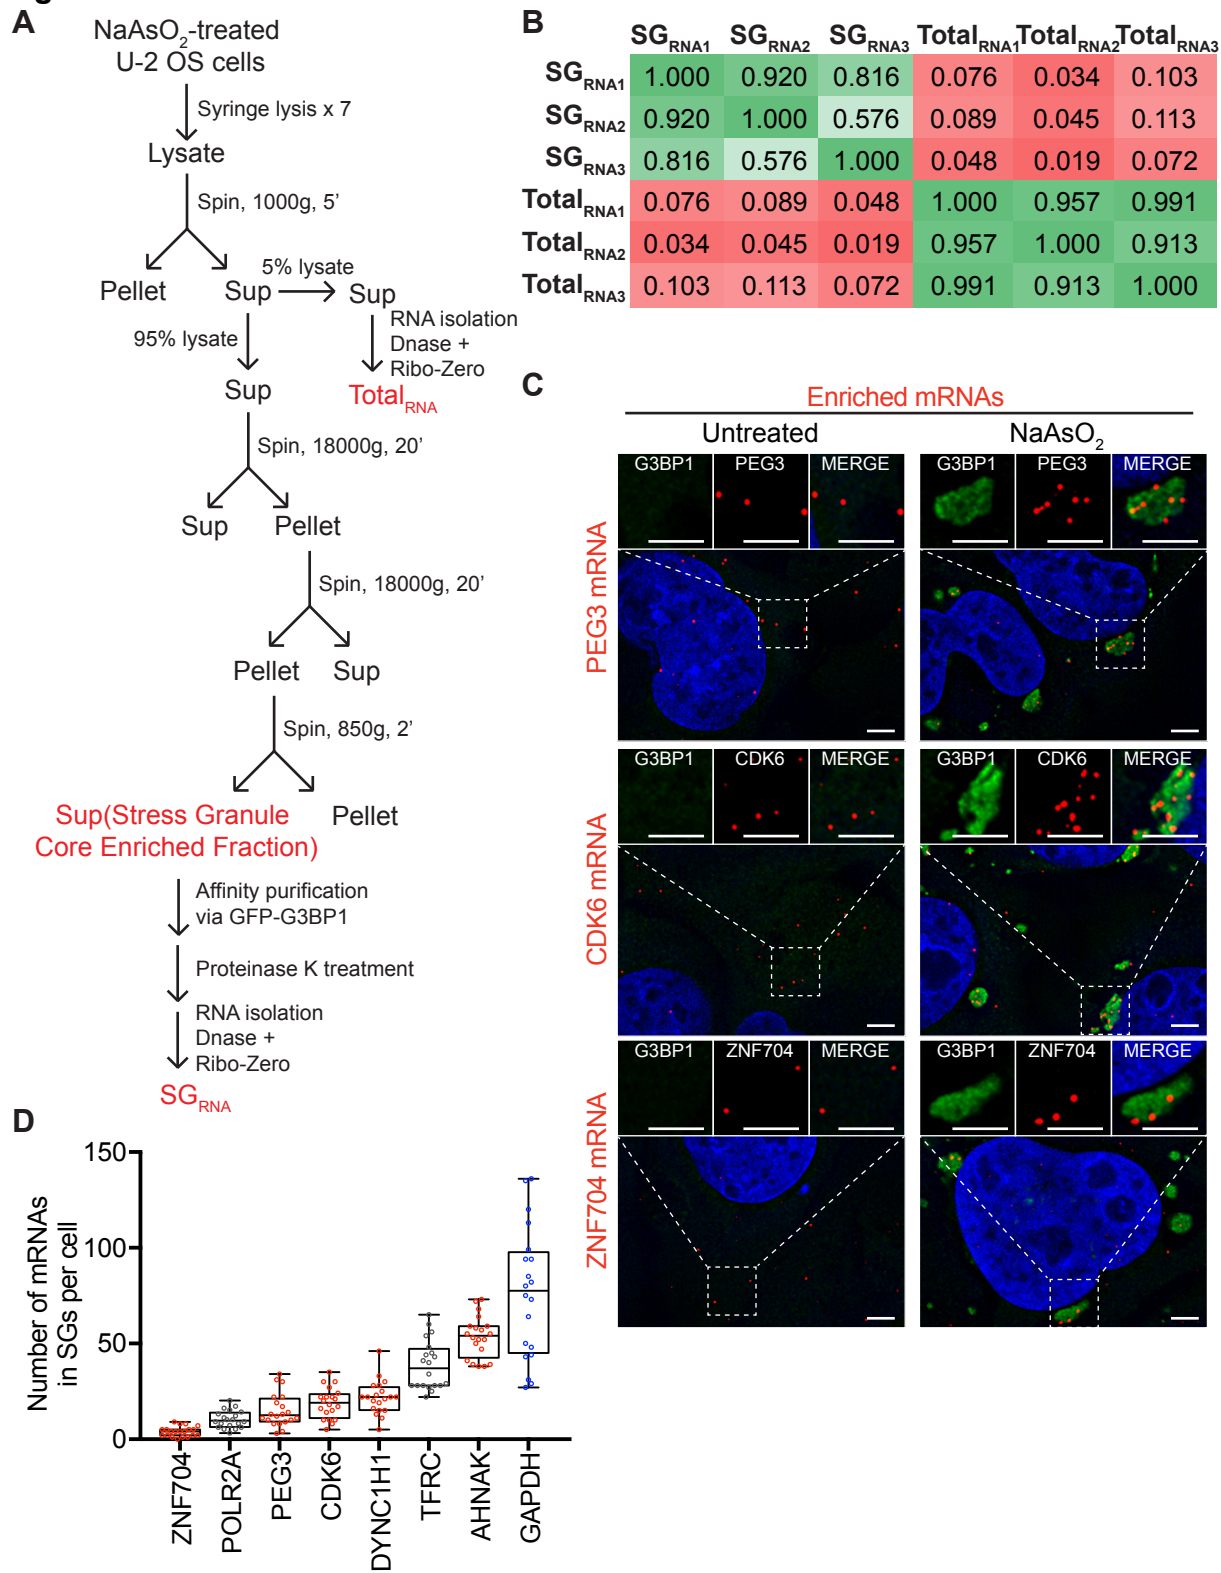

**Figure S2**

**A**

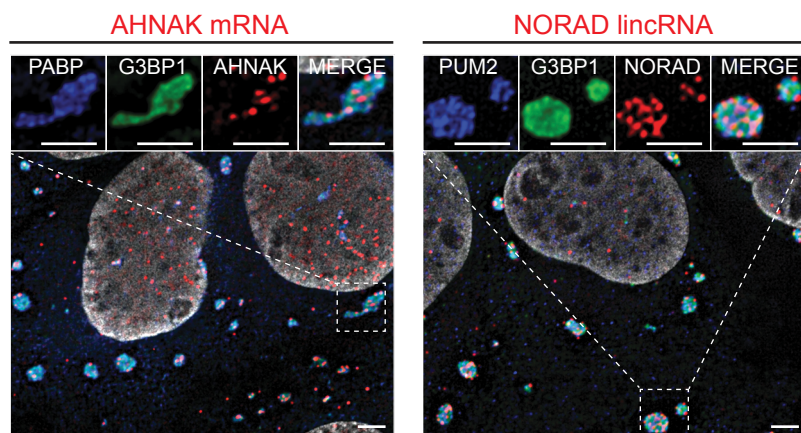

**B**

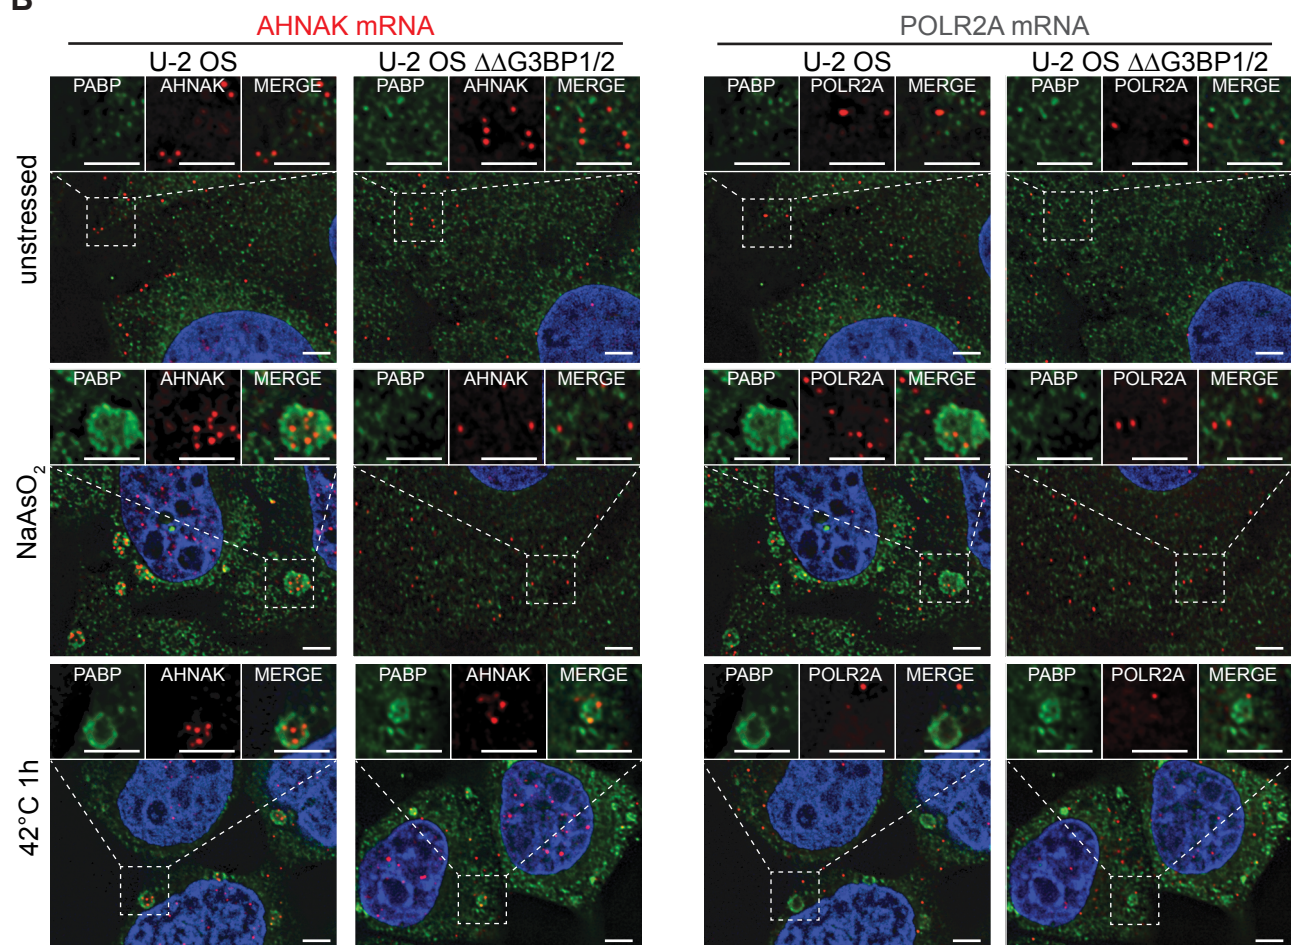

**Figure S3**

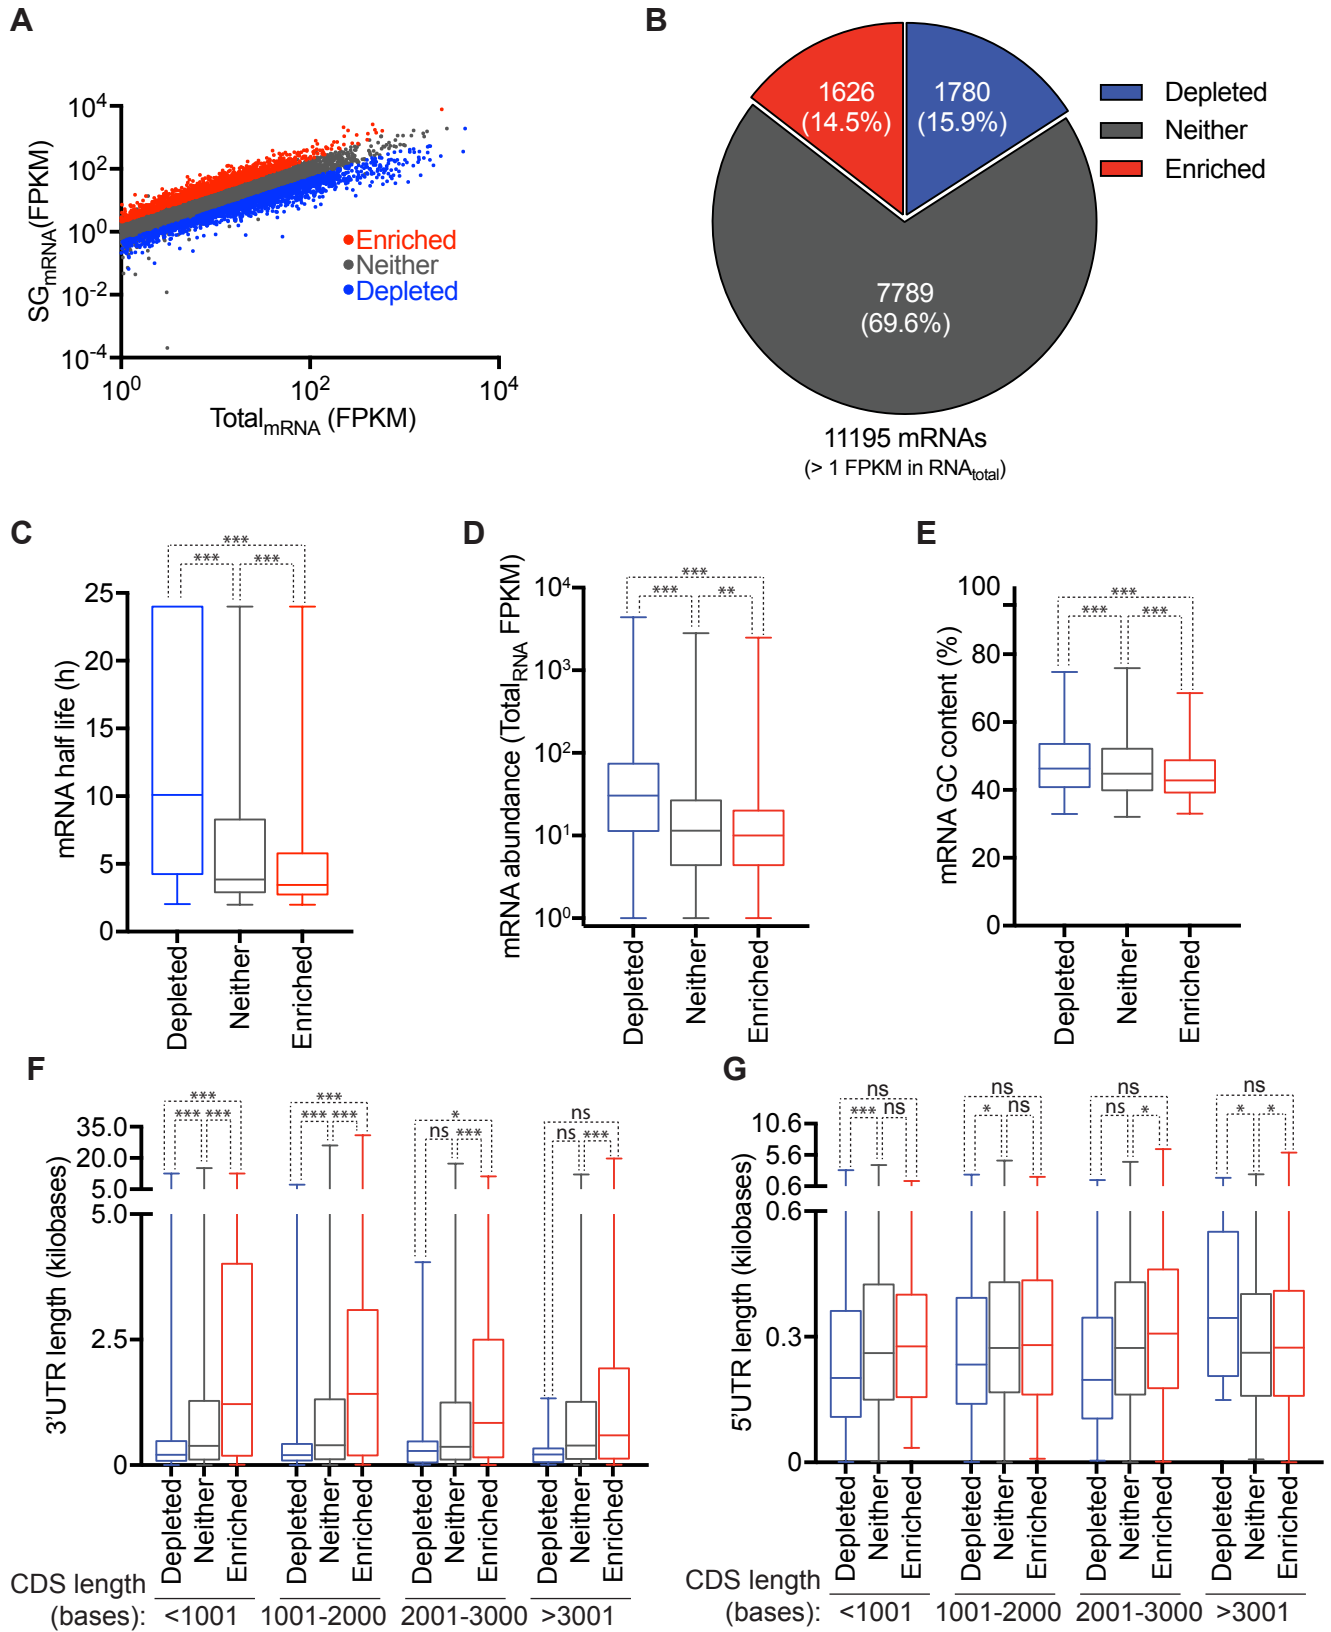

**Figure S4**

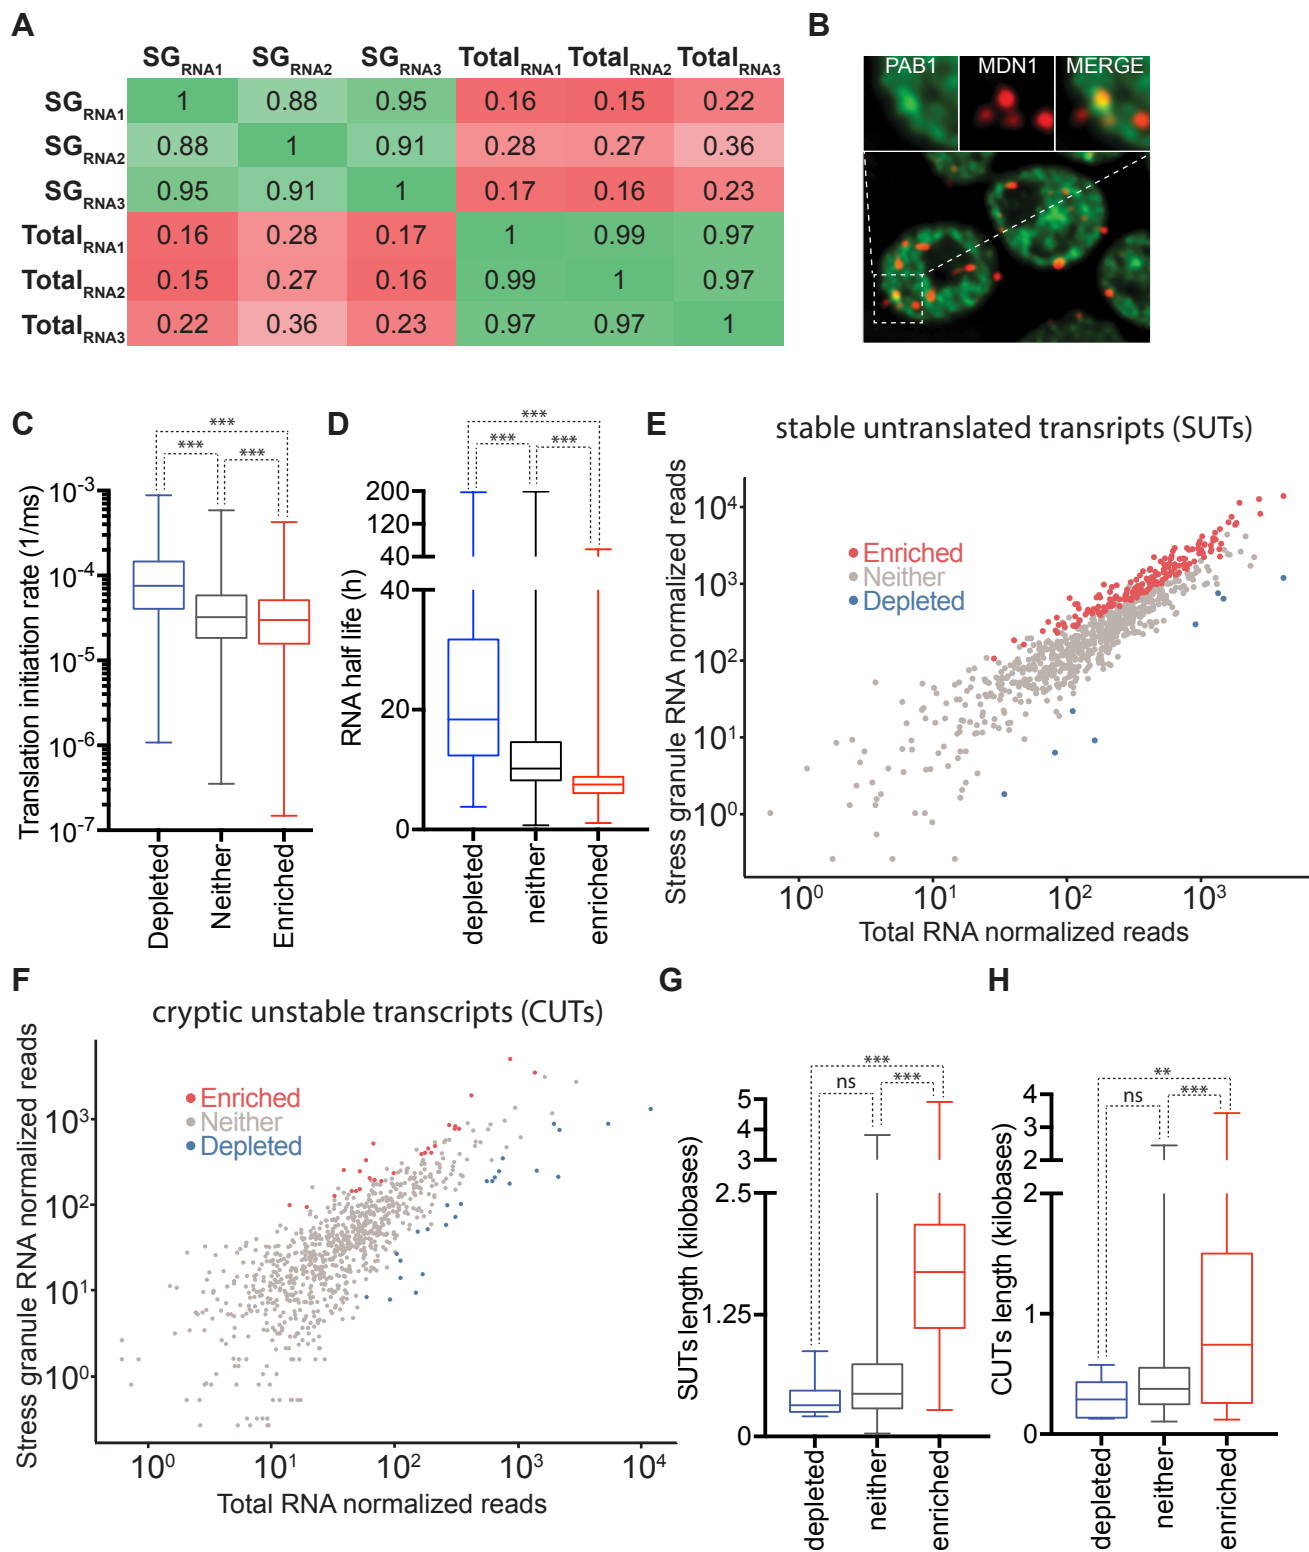

**Figure S5**

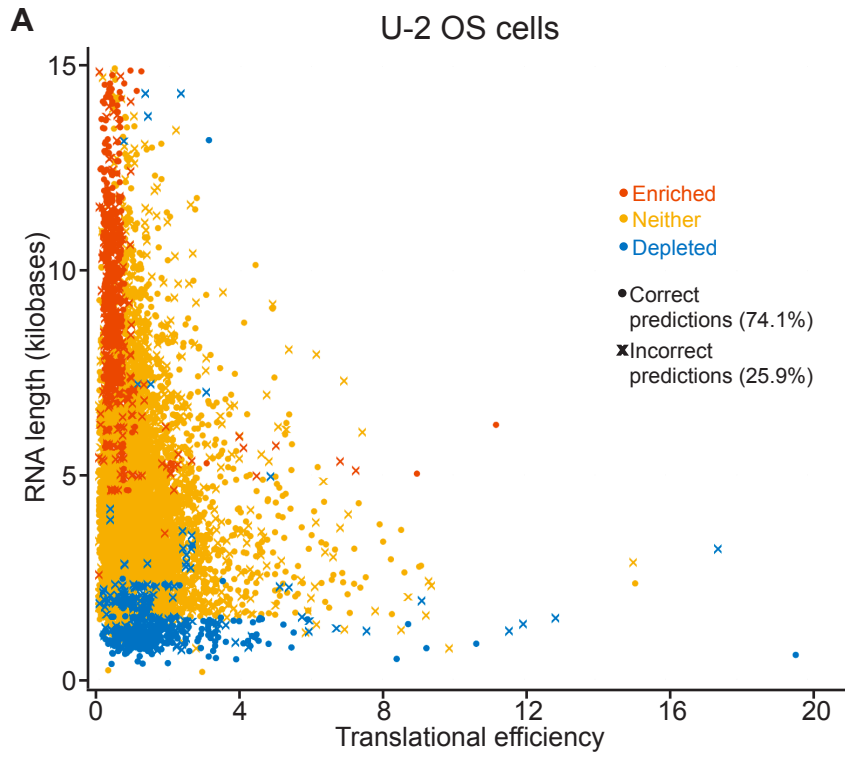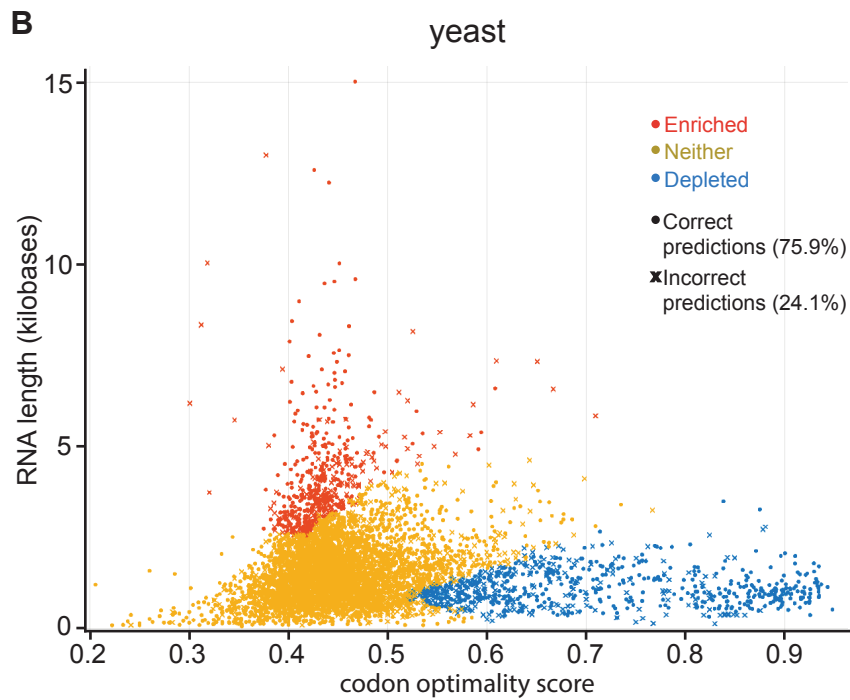

**Figure S6**

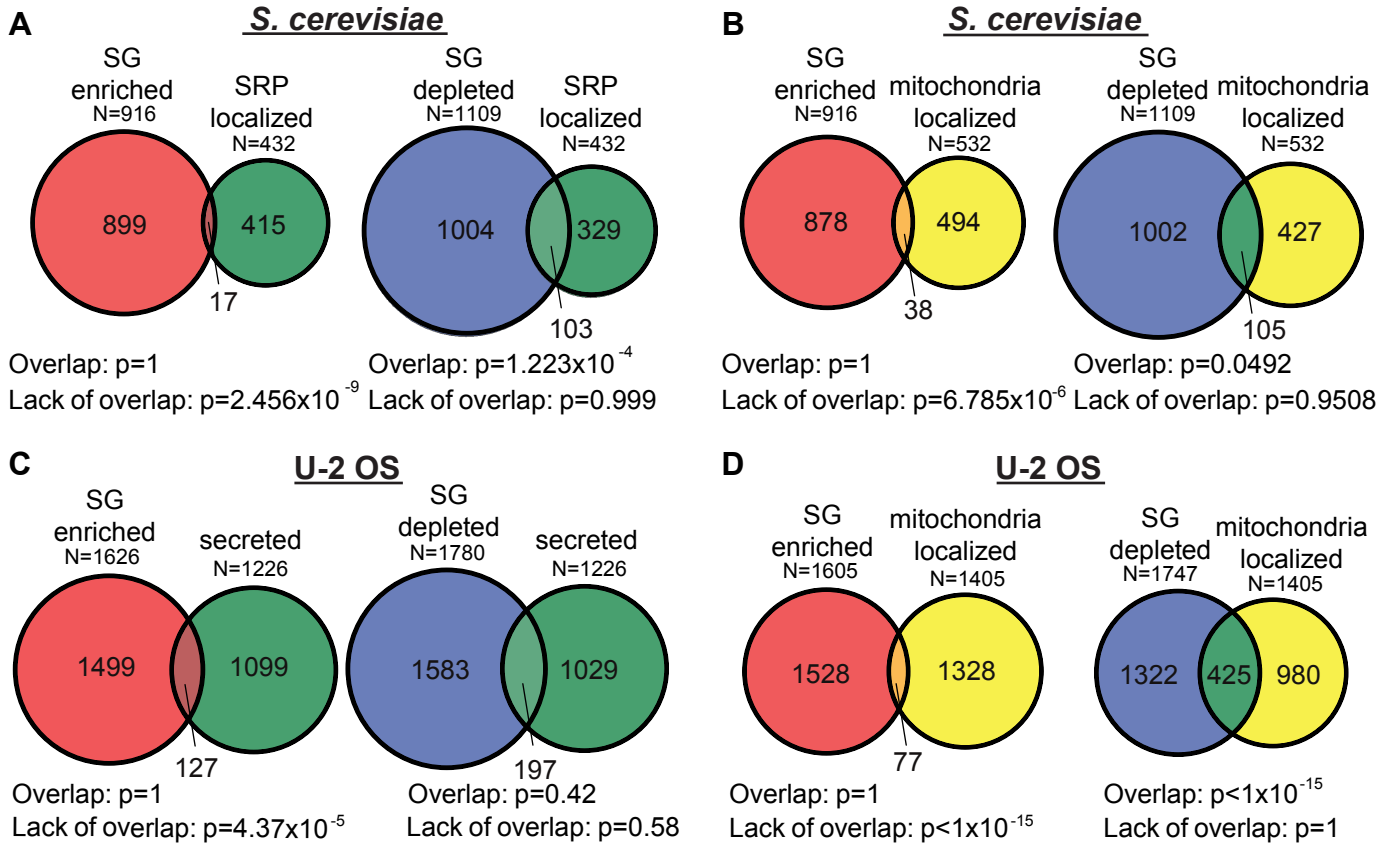

**Table S1A: Most enriched cytosolic mRNAs in SGs. Related to Figures 1-2.**

| Gene symbol  | Gene description                                             | SG enrichment | mRNA length (bases) | Number of mRNAs in SGs/cell | Number of mRNAs in cell | % of mRNAs in SGs |
|--------------|--------------------------------------------------------------|---------------|---------------------|-----------------------------|-------------------------|-------------------|
| AHNAK2       | AHNAK nucleoprotein 2                                        | 11.00         | 18,335              | 5.1                         | 4.0                     | >95*              |
| RP11-438J1.1 | Not available                                                | 10.84         | 2,831               | 1.4                         | 1.1                     | >95*              |
| BCL9L        | B-cell CLL/lymphoma 9 like                                   | 9.50          | 10,005              | 11.5                        | 10.4                    | >95*              |
| MAP1A        | microtubule associated protein 1A                            | 9.46          | 10,553              | 5.9                         | 5.3                     | >95*              |
| MACF1        | microtubule-actin crosslinking factor 1                      | 9.40          | 24,828              | 34.7                        | 31.4                    | >95*              |
| CHD7         | chromodomain helicase DNA binding protein 7                  | 9.17          | 11,568              | 11.6                        | 10.8                    | >95*              |
| MAML1        | mastermind like transcriptional coactivator 1                | 8.51          | 6,559               | 4.1                         | 4.1                     | >95*              |
| CDR1         | cerebellar degeneration related protein 1                    | 8.43          | 2,467               | 2.1                         | 2.1                     | >95*              |
| KMT2D        | lysine methyltransferase 2D                                  | 8.33          | 19,419              | 11.2                        | 11.4                    | >95*              |
| HERC2        | HECT and RLD domain containing E3 ubiquitin protein ligase 2 | 7.90          | 15,337              | 15.9                        | 17.1                    | >95*              |

\*% of mRNAs in SGs greater than 95%

**Table S1B: Most abundant cytosolic mRNAs in SGs. Related to Figures 1-2.**

| Gene symbol | Gene description                                   | SG enrichment | mRNA length (bases) | Number of mRNAs in SGs/cell | Number of mRNAs in cell | % of mRNAs in SGs |
|-------------|----------------------------------------------------|---------------|---------------------|-----------------------------|-------------------------|-------------------|
| ACTB        | actin beta                                         | 0.44          | 2,245               | 178.2                       | 3440                    | 5.2               |
| CHD4        | chromodomain helicase DNA binding protein 4        | 3.56          | 6,554               | 159.2                       | 381                     | 41.8              |
| EIF4G2      | eukaryotic translation initiation factor 4 gamma 2 | 1.34          | 6,769               | 154.3                       | 981                     | 15.7              |
| THBS1       | thrombospondin 1                                   | 2.78          | 7,775               | 149.2                       | 457                     | 32.7              |
| EEF2        | eukaryotic translation elongation factor 2         | 0.89          | 3,164               | 142.9                       | 1364                    | 10.5              |
| HSPA8       | heat shock protein family A (Hsp70) member 8       | 0.98          | 2,463               | 106.3                       | 929                     | 11.4              |
| PABPC1      | poly(A) binding protein cytoplasmic 1              | 1.95          | 3,485               | 101.5                       | 444                     | 22.9              |
| ERBB2IP     | erb2 interacting protein                           | 4.76          | 8,647               | 100.9                       | 181                     | 55.9              |
| PKM         | pyruvate kinase, muscle                            | 0.66          | 3,016               | 98.5                        | 1264                    | 7.8               |
| COL1A1      | collagen type I alpha 1 chain                      | 2.08          | 6,727               | 77.2                        | 317                     | 24.4              |

**Table S2: Most enriched mRNA in yeast. Related to Figure S6.**

| Gene symbol | Description                             | SG enrichment | RNA length (bases) |
|-------------|-----------------------------------------|---------------|--------------------|
| FIG2        | Factor-induced gene                     | 8.82          | 5721               |
| DAN4        | Delayed ANaerobic                       | 8.28          | 3544               |
| BNI1        | Bud Neck Involved                       | 6.64          | 6265               |
| HKR1        | Hansenula mrakii Killer toxin Resistant | 5.83          | 5582               |
| FLO1        | FLOcculation                            | 5.83          | 3228               |
| NFT1        | New Full-length MRP-type Transporter    | 5.32          | 3657               |
| SAG1        | Sexual AGglutination                    | 5.25          | 2091               |
| PRP8        | Pre-mRNA Processing                     | 5.21          | 7320               |
| PMD1        | Paralog of MDS3                         | 5.12          | 5447               |
| HSL1        | Histone Synthetic Lethal                | 4.71          | 4912               |



**Table S3A: Most enriched lincRNA in mammalian SGs.  
Related to Figure 5.**

| Gene symbol       | SG enrichment | RNA length (bases) | Number of RNAs in SGs/cell | Number of RNAs in cell | % of RNAs in SGs |
|-------------------|---------------|--------------------|----------------------------|------------------------|------------------|
| RP11-1100L3.8     | 8.10          | 687                | 0.79                       | 0.83                   | 95               |
| RP11-123O10.4     | 5.05          | 192                | 0.99                       | 1.64                   | 59               |
| CTC-444N24.11     | 4.99          | 4,258              | 1.38                       | 2.35                   | 58               |
| CTC-459F4.1       | 4.99          | 3,666              | 0.47                       | 0.81                   | 58               |
| LINC00657 (NORAD) | 4.62          | 5,339              | 11.1                       | 20.5                   | 54               |
| AC004449.6        | 4.34          | 433                | 0.65                       | 1.29                   | 51               |
| CITF22-49D8.1     | 4.19          | 4,364              | 0.64                       | 1.31                   | 49               |
| RP11-521L9.1      | 4.13          | 260                | 0.92                       | 1.90                   | 48               |
| RP11-284F21.9     | 4.08          | 3,222              | 0.72                       | 1.51                   | 48               |
| BAIAP2-AS1        | 4.07          | 4,465              | 3.30                       | 6.97                   | 48               |

**Table S3B: Most enriched SUTs in yeast SGs.  
Related to Figure 6.**

| Gene symbol | SG enrichment | Average SG reads | RNA length (bases) |
|-------------|---------------|------------------|--------------------|
| ST4580      | 5.95          | 11511            | 4280               |
| ST4796      | 5.29          | 991              | 1344               |
| ST6623      | 4.99          | 2226             | 1880               |
| ST6969      | 4.71          | 12772            | 3280               |
| ST2060      | 4.67          | 2963             | 2728               |
| ST6465      | 4.36          | 2678             | 1824               |
| ST2371      | 4.08          | 4158             | 1824               |
| ST1657      | 3.99          | 6353             | 3528               |
| ST1280      | 3.82          | 2303             | 1664               |
| ST5030      | 3.77          | 5183             | 2248               |

**Figure S1 (related to Figure 1): Purification and analysis of the RNA content in mammalian SG cores**

(A) Schematic depicting how SG cores were purified. In brief, SG formation was induced by sodium arsenite stress (.5mM, 1 hour) in a G3BP1-GFP tagged U-2 OS cell line. Cells were then subjected to syringe lysis, followed by a series of centrifugation steps. This stress granule core enriched fraction was then affinity purified via GFP-G3BP1 and proteinase K treated. RNA was isolated via trizol extraction and ribodepleted, yielding purified SG core RNA. (B) Pairwise  $R^2$  correlations between individual replicates of SG purified RNA and total RNA. (C) smFISH validation of mRNAs enriched in SGs (PEG3, CDK6, and ZNF704). Scale bar = 2 $\mu$ m. (D) Quantification of the average number of each indicated transcripts that occur in SGs per cell. Twenty cells were counted for each experiment.

**Figure S2 (related to Figure 1): Validation of the RNA-content in bonafide SGs**

(A) Arsenite-treated U-2 OS cells co-stained for (Left) PABP protein, G3BP1 protein, and AHNAK mRNA or (Right) PUM2 protein, G3BP1 protein, and NORAD lincRNA. (B) Arsenite-treated wildtype U-2 OS cells and  $\Delta\Delta$ G3BP1/2 U-2 OS cells were co-stained for PABP protein, (left) AHNAK mRNA, and (right) POLR2A mRNA. Scale bar = 2 $\mu$ m.

**Figure S3 (related to Figure 4): Properties of differential mRNA recruitment to mammalian SGs**

(A) Scatter plot depicting mRNA abundance (FPKM) in SG purified RNA vs. Total RNA. Red dots indicate mRNAs that are significantly enriched (Fold change > 2 and  $p < .01$ ) in

SG purified RNA compared to Total RNA. Blue dots indicate mRNAs that are significantly depleted (Fold change  $<.05$  and  $p >.01$ ) in SG purified RNA compared to Total RNA. Gray dots indicate mRNAs that are either not significantly enriched or fail to meet the fold change requirement. (B) Pie chart depicting the relative contribution of each class of ncRNA (SG-enriched, SG-depleted, or neither) to the SG transcriptome. (C-E) Boxplots depicting (C) mRNA half-life, (D) mRNA abundance, and (E) GC content for the three classes of localization: SG enriched mRNAs, SG depleted mRNAs, or neither. (F) Boxplots illustrating 3' UTR length at various ORF lengths for each class of mRNA localization. mRNA ORF lengths were binned every kilobase. (G) Same as in F but for 5' UTR lengths. n.s., \*, \*\*, and \*\*\* = p value (Student's t-test)  $> 0.05$ ,  $\leq 0.05$ ,  $\leq 0.01$ , and  $\leq 0.001$  respectively.

**Figure S4 (related to Figure 6): Purification and analysis of the RNA content in yeast SG cores**

(A) Pairwise  $R^2$  correlations between individual replicates of SG purified RNA from yeast and total yeast RNA. (B) RNA smFISH of MDN1 after 30 minutes of sodium azide treatment in Pab-GFP expressing yeast. (C) Boxplot showing predicted translation initiation rates for SG enriched RNA, SG depleted RNA, and RNA that shows no preference. (D) Boxplot depicting RNA half-lives for SG enriched RNA, SG depleted RNA, and RNA that shows no preference. (E) Scatterplot illustrating SUTs that are enriched in SGs (red), depleted from SGs (blue), or neither (gray). (F) Same as E but for CUTs. (G) Boxplot depicting transcript length of SUTs for each class of mRNA localization. (H) Same

as G but for CUTs. n.s., \*\*, and \*\*\* = p value (Student's t-test) > 0.05, ≤0.01, and ≤0.001 respectively.

**Figure S5 (related to Figures 4 and 6): Machine learning model accurately predicts mRNA localization in SGs**

(A) A machine learning model accurately predicts 74.1% of mammalian mRNA localization during stress based on ribosome density and transcript length alone. (B) A machine learning model accurately predicts 75.9% of yeast mRNA localization during stress based on fraction optimal codons and transcript length alone.

**Figure S6 (related to Figures 4 and 6): Membrane targeting affects SG localization**

(A) Venn diagram depicting the overlap between (*Left*) yeast SG-enriched mRNAs and mitochondrial-localized genes or (*Right*) yeast SG-depleted mRNAs and mitochondrial-localized genes. (B) Venn diagram illustrating the overlap between (*Left*) yeast SG-enriched mRNAs and SRP localized genes or (*Right*) SG-depleted mRNAs and SRP localized genes. (C) Venn diagram illustrating the overlap between (*Left*) human SG-enriched mRNAs and mitochondrial-localized genes or (*Right*) SG-depleted mRNAs and mitochondrial-localized genes. (D) Venn diagram illustrating the overlap between (*Left*) human SG-enriched mRNAs and SRP localized genes or (*Right*) SG-depleted mRNAs and SRP localized genes.
